# Supplementary material for: Potential distribution of three invasive agricultural pests in China under climate change
Source: Research Square preprint supplement (doi:10.21203/rs.3.rs-3926618/v1), 2024-02-13
Supplement: Supplementary file 1 [file f44765363ca06a56edd2c907.xlsx]

## Sheet: Sheet1
		Table.2 Suitable areas change for E. toru Evans, R.ferrugineus and O.arenosella under different climate change scenarios
Species		Erionota toru Evans							Rhynchophorus ferrugineus							Opisina arenosella
scenario			SSP126			SSP585				SSP126			SSP585				SSP126			SSP585
Suitable habitats	time period	current	2041-2060	2061-2080	2081-2100	2041-2060	2061-2080	2081-2100	current	2041-2060	2061-2080	2081-2100	2041-2060	2061-2080	2081-2100	current	2041-2060	2061-2080	2081-2100	2041-2060	2061-2080	2081-2100
High-suitable habitats	area/km²	1.73	1.55	1.83	1.77	1.86	2.38	2.53	4.25	4.96	2.63	3.91	1.99	1.93	1.15	0.73	2.12	1.18	2.39	2.24	4.67	1.15
	increased area/km²		-0.18	0.1	0.04	0.13	0.65	0.8		0.71	-1.62	-0.34	-2.26	-2.32	-3.1		1.39	0.45	1.66	1.51	3.94	0.42
	Percentage	0.0018	0.0016	0.0019	0.0018	0.0019	0.0025	0.0026	0.0044	0.0052	0.0027	0.0041	0.0021	0.002	0.0012	0.0008	0.0022	0.0012	0.0025	0.0023	0.0049	0.0012
Middle-suitable habitats	area/km²	1.07	1.23	1.23	1.17	1.17	1.16	1.32	5.45	5.95	5.38	6.73	5.19	5.7	3.53	2	2.01	2.27	2.42	2.64	3.81	3.81
	increased area/km²		0.16	0.16	0.1	0.1	0.09	0.25		0.5	-0.07	1.28	-0.26	0.25	-1.92		0.01	0.27	0.42	0.64	1.81	1.81
	Percentage	0.0011	0.0013	0.0013	0.0012	0.0012	0.0012	0.0014	0.0057	0.0062	0.0056	0.007	0.0054	0.0059	0.0037	0.0021	0.0021	0.0028	0.0025	0.0027	0.004	0.004
Low-suitable habitats	area/km²	25.87	24.84	25.72	35.07	25.79	23.02	19.44	215.95	77.73	63.49	84.62	70.44	63.39	53.03	1.91	2.91	2.92	3.63	3.53	8.27	7.41
	increased area/km²		-1.03	-0.15	9.2	-0.08	-2.85	-6.43		-138.22	-152.46	-131.33	-145.51	-152.56	-162.92		1	1.01	1.72	1.62	6.36	5.5
	Percentage	0.0269	0.0259	0.0268	0.0365	0.0269	0.024	0.0203	0.225	0.081	0.0661	0.0881	0.0734	0.066	0.0552	0.002	0.003	0.003	0.0038	0.0037	0.0086	0.0077
Non-suitable habitats	area/km²	931.33	932.38	931.22	921.98	931.18	933.43	936.71	734.35	871.36	888.51	864.74	882.37	888.98	902.29	955.36	952.78	953.18	951.55	951.59	943.25	947.63
	increased area/km²		1.05	-0.11	-9.35	-0.15	2.1	5.38		137.01	154.16	130.39	148.02	154.63	167.94		-2.58	-2.18	-3.81	-3.77	-12.11	-7.73
	Percentage	0.9701	0.9712	0.97	0.9604	0.97	0.9723	0.9757	0.765	0.9077	0.9255	0.9008	0.9191	0.926	0.9399	0.9952	0.9025	0.9229	0.9912	0.9912	0.926	0.9399
Total-suitable habitats	area/km²	28.67	27.62	28.78	38.02	28.82	26.57	23.29	225.65	88.64	71.49	95.26	77.63	71.02	57.71	4.64	7.04	6.82	8.45	8.41	16.75	12.37
	increased area/km²		-1.05	0.11	9.35	0.15	-2.1	-5.38		-137.01	-154.16	-130.39	-148.02	-154.63	-167.94		2.4	2.18	3.81	3.77	12.11	7.73
	Percentage	0.0299	0.0288	0.03	0.0396	0.03	0.0277	0.0243	0.235	0.0923	0.0745	0.0992	0.0809	0.074	0.0601	0.0048	0.0073	0.0071	0.0088	0.0088	0.0175	0.0129
Note:"-" indicates the area reduced compared with the current climate conditions, the proportion refers to the proportion of various suitable habitats to the total area; SSP: Shared socioeconomic pathways
